# Supplementary material for: Aldehyde Dehydrogenase Genes as Prospective Actionable Targets in Acute Myeloid Leukemia
Source: Preprints.org preprint supplement (doi:10.20944/preprints202307.1157.v1), 2023-07-18
Supplement: Supplementary file 1 [file supplementary]

## Sheet: top_genes
	MEAN_AUC	TCGA	TARGET	BEAT_BMA	BEAT_PB	GSE37642_1	GSE37642_2	GSE6891_1	GSE6891_2
GALNT12	0.836598	0.934028	0.866667	0.833333	0.765121	0.74321	0.788067	0.853646	0.908709
PLXNC1	0.817771	0.810764	0.95	0.745912	0.790323	0.642181	0.780391	0.902778	0.91982
RUNX3	0.801948	0.755208	0.766667	0.837421	0.842742	0.71358	0.79185	0.815625	0.892492
LSP1	0.7947	0.840278	0.7875	0.788679	0.882056	0.640123	0.702787	0.815278	0.900901
CD109	0.791738	0.880208	0.716667	0.868553	0.707661	0.824074	NA	0.718576	0.826426
LRRC16A	0.788105	0.81684	NA	0.839308	0.788306	0.744856	0.690892	0.828125	0.808408
ALDH1A1	0.782024	0.80599	0.904167	0.736164	0.849798	0.710494	0.735505	0.7375	0.776577
CPNE8	0.777781	0.988715	0.983333	0.559434	0.544355	0.5	NA	0.906771	0.961862
CMTM4	0.777529	0.881076	0.791667	0.745597	0.751008	0.576337	NA	0.864583	0.832432
TJP2	0.77644	0.902778	0.775	0.726415	0.797379	0.678601	0.705618	0.777083	0.848649
ANKS6	0.775652	0.913194	0.775	0.787421	0.730847	0.690741	NA	0.76059	0.771772
SPATS2L	0.77263	0.713542	0.975	0.75	0.75	0.676132	0.720916	0.818576	0.776877
SYNE1	0.771102	0.835938	0.7625	0.708176	0.850806	0.610905	0.724672	0.808854	0.866967
INPP4B	0.762421	0.900174	0.65	0.771069	0.80746	0.588272	0.746938	0.809028	0.826426
TPD52	0.762263	0.847222	0.916667	0.722013	0.734879	0.657613	0.725244	0.759028	0.735435
	MEAN_AUC	TCGA	TARGET	BEAT_BMA	BEAT_PB	GSE37642_1	GSE37642_2	GSE6891_1	GSE6891_2
MPO	0.192	0.049	0.104	0.288	0.26	0.445	0.276	0.045	0.071
TGIF1	0.216	0.076	0.096	0.304	0.239	0.371	0.355	0.135	0.151
CLEC11A	0.226	0.149	0.25	0.251	0.249	0.317	0.244	0.183	0.168
DEPDC7	0.229	0.125	0.325	0.265	0.33	0.285	NA	0.13	0.144
CFD	0.229	0.089	0.592	0.109	0.167	0.287	0.224	0.192	0.174
SLC25A29	0.24	0.203	0.163	0.245	0.299	0.357	NA	0.229	0.183
MICALL2	0.24	0.157	0.504	0.144	0.154	0.34	0.235	0.129	0.257
NRBP1	0.241	0.16	0.133	0.285	0.332	0.242	0.313	0.221	0.242
NTNG2	0.242	0.115	0.171	0.251	0.418	0.369	NA	0.154	0.216
TSNAX-DISC1	0.243	NA	NA	NA	NA	0.437	0.363	0.087	0.086
CD99	0.243	0.166	0.213	0.293	0.326	0.371	0.331	0.133	0.114
LPPR3	0.25	0.097	NA	0.177	0.195	0.44	0.363	0.247	0.235
DAGLB	0.254	0.09	0.05	0.465	0.413	0.497	NA	0.168	0.091
FAM45B	0.254	0.099	NA	0.297	0.348	0.436	0.363	0.114	0.124
P2RX4	0.257	0.224	0.146	0.26	0.266	0.356	0.31	0.283	0.208
